# Supplementary material for: A hierarchically engineered polymer composite with a dual-scatter structure for enhanced passive radiative cooling
Source: Royal Society of Chemistry journal article supplement (doi:10.1039/d4ta07793h), 2025-01-01
Supplement: d4ta07793h1.pdf [file d4ta07793h1.pdf]

Electronic Supplementary Information (ESI) for

**Hierarchically Engineered Polymer Composite with High Solar Reflectivity  
and Selective Thermal Emissivity for Enhanced Radiative Cooling**

*Hyunho Park,<sup>a</sup> Beom Soo Joo,<sup>a</sup> Gumin Kang,<sup>\*a</sup> Hyungduk Ko,<sup>\*a</sup> and Jin Hong Kim<sup>\*a</sup>*

<sup>a</sup> Nanophotonics Research Center, Korea Institute of Science and Technology, Seoul  
02792, Republic of Korea

\* E-mail: guminkang@kist.re.kr, kohd94@kist.re.kr, jinhong.kim@kist.re.kr





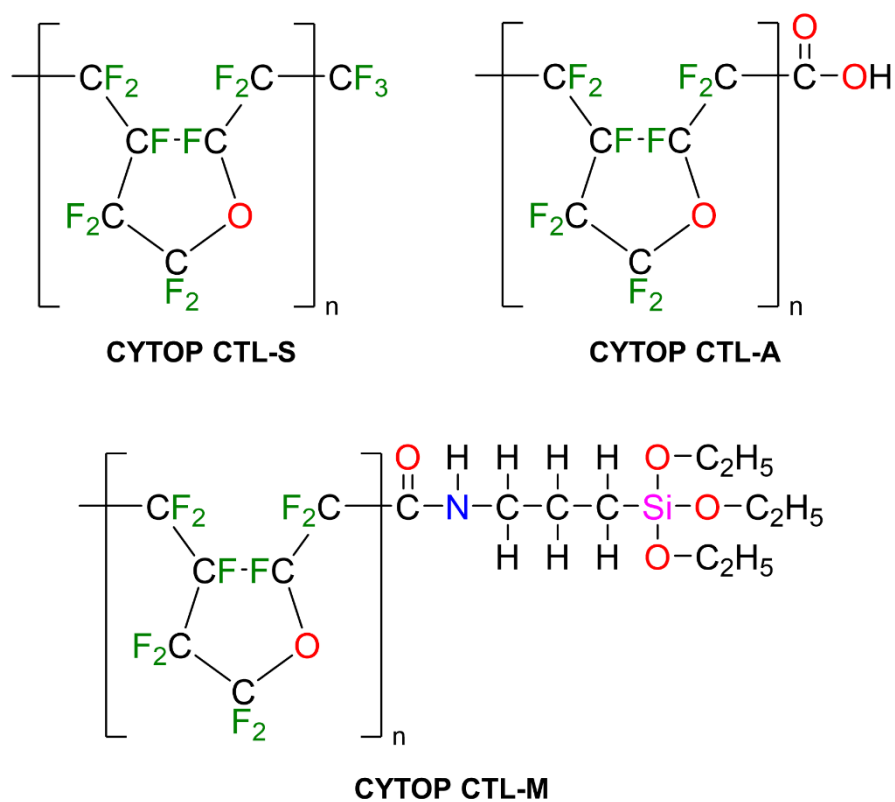

**Fig. S3** Chemical structures of various CYTOP models.

Note: Although the main polymer backbone of all CYTOP models consist of C–F and C–O–C chemical bonds, the terminal groups vary, which can affect IR emission. As predicted by DFT theoretical calculations, CYTOP CTL-S is expected to exhibit higher IR selectivity than other models, including CYTOP CTL-M (used in this work).

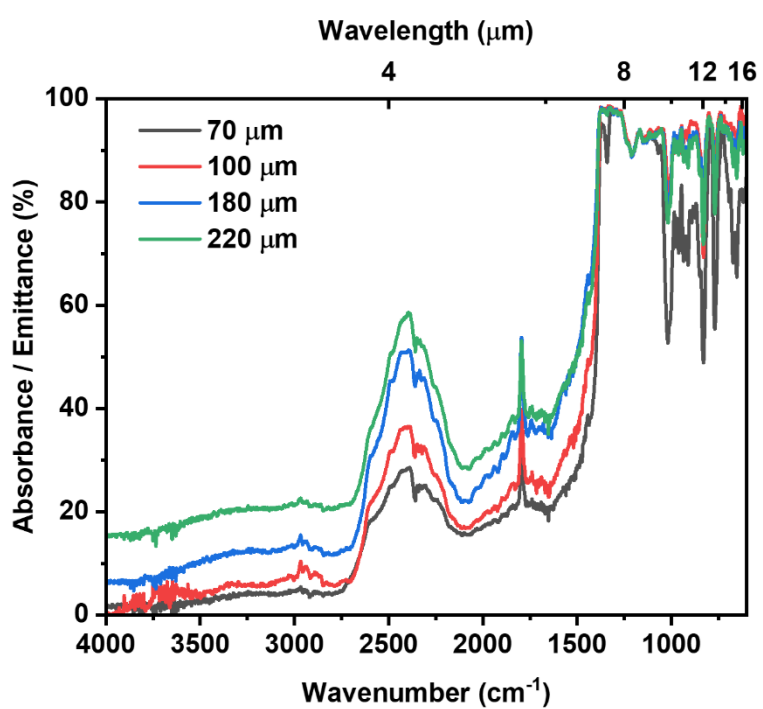

Fig. S4 IR emission depending on CYTOP thickness.

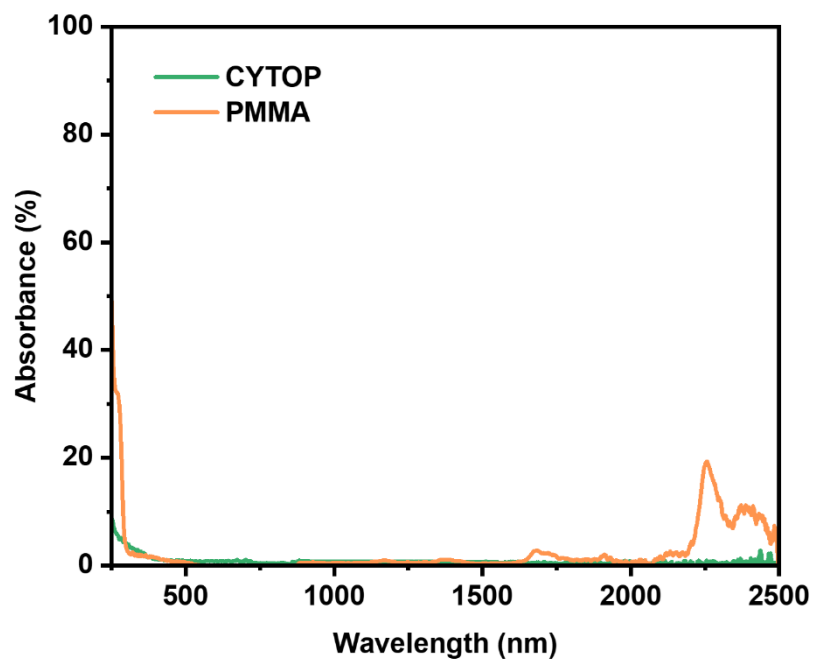

**Fig. S5** UV-Vis-NIR absorption spectra of CYTOP and PMMA freestanding films.

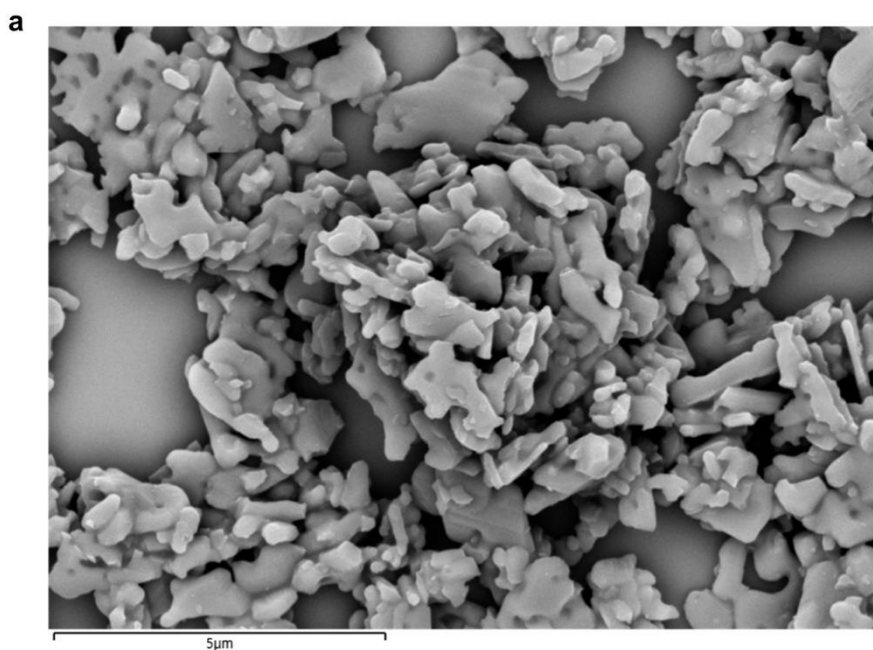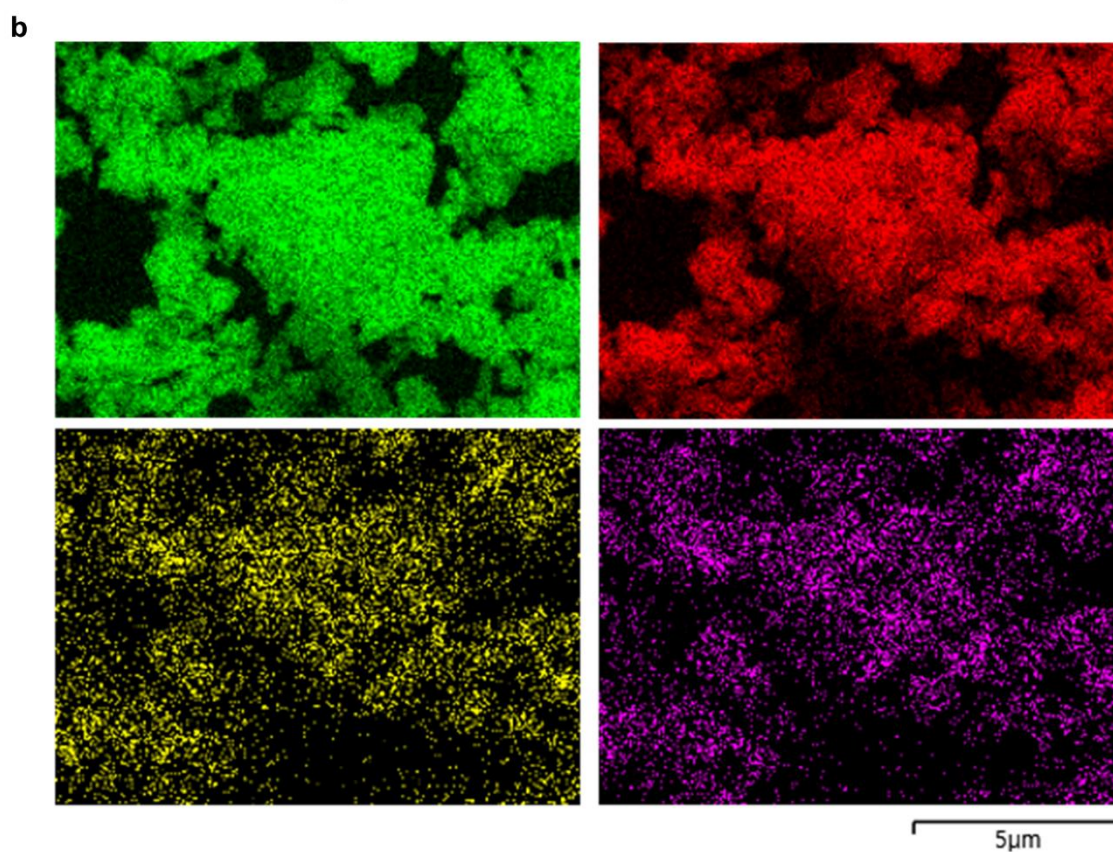

**Fig. S6** a) SEM image of Al<sub>2</sub>O<sub>3</sub>-PFOTS nanoparticles and b) EDS elemental mapping images of Al (green), O (red), F (yellow), and C (purple).

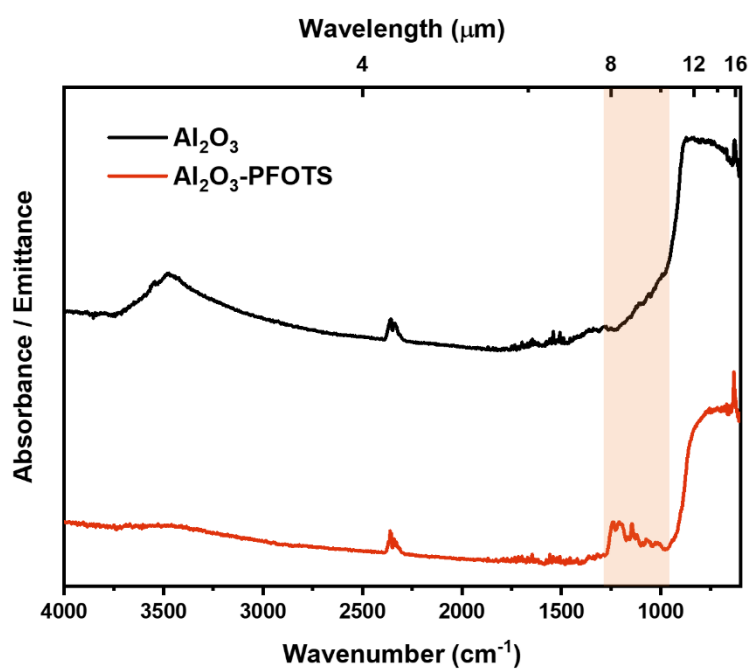

Fig. S7 FTIR spectra of Al<sub>2</sub>O<sub>3</sub> (black line) and Al<sub>2</sub>O<sub>3</sub>-PFOTS (red line).



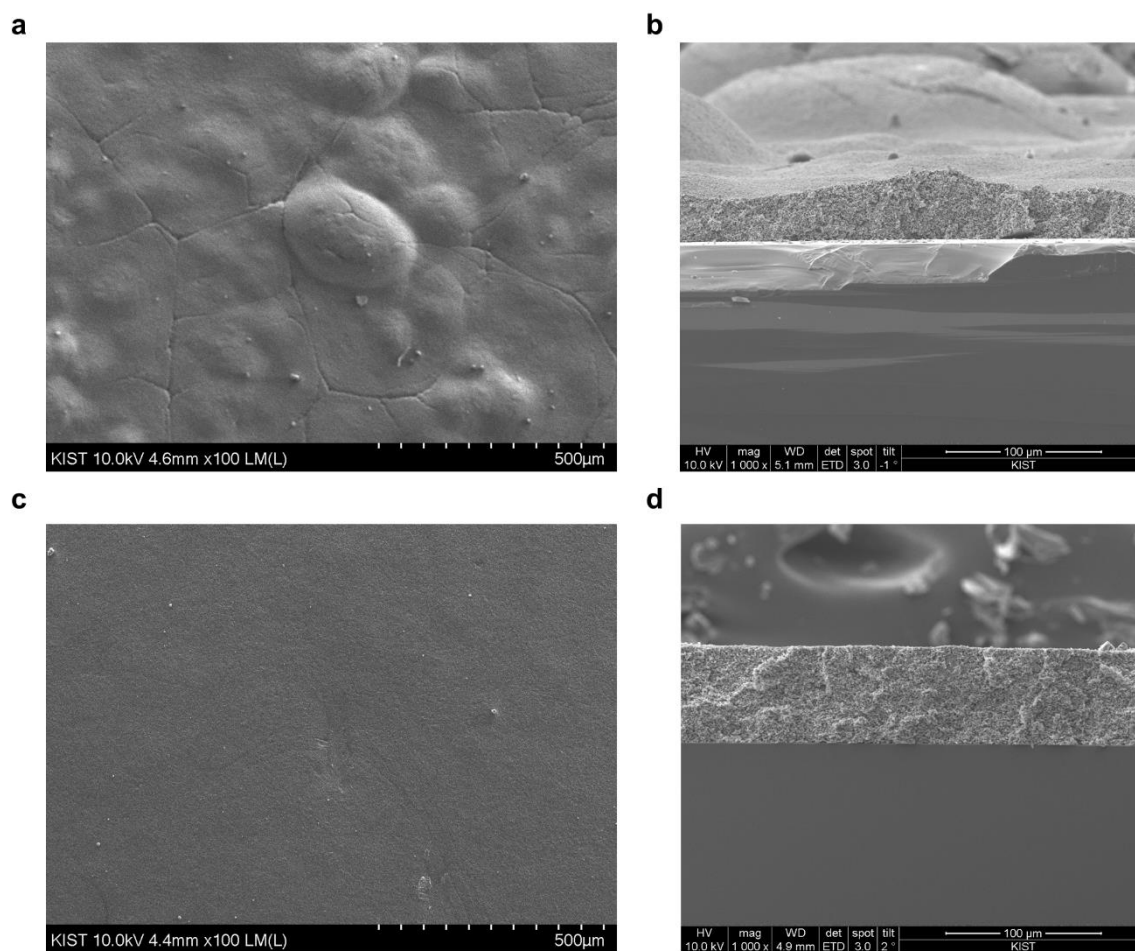

**Fig. S8** SEM images of CYTOP/Al<sub>2</sub>O<sub>3</sub> and CYTOP/Al<sub>2</sub>O<sub>3</sub>-PFOTS. a) Top view and b) cross-sectional view of CYTOP/Al<sub>2</sub>O<sub>3</sub>. c) Top view and d) cross-sectional view of CYTOP/Al<sub>2</sub>O<sub>3</sub>-PFOTS.

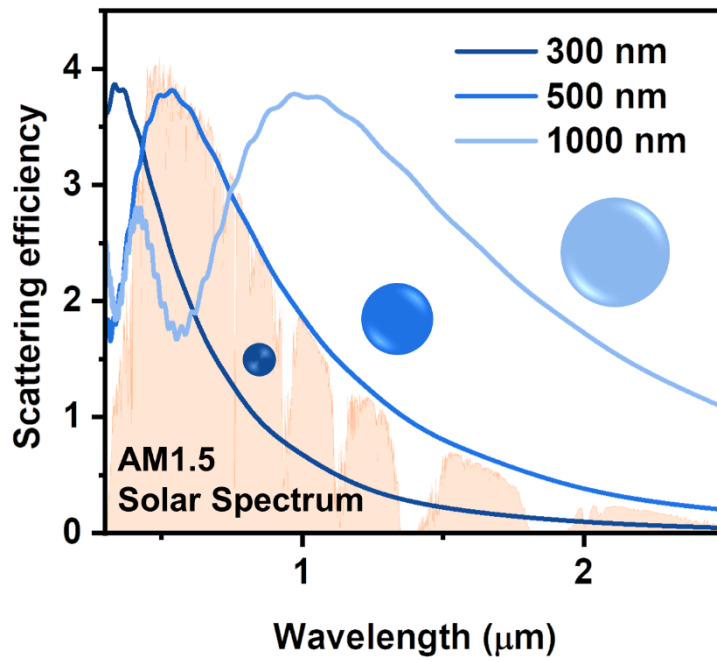

**Fig. S9** Calculated Mie scattering efficiency of  $\text{Al}_2\text{O}_3$  nanoparticles with diameters of 300, 500, 1000 nm in CYTOP matrix.

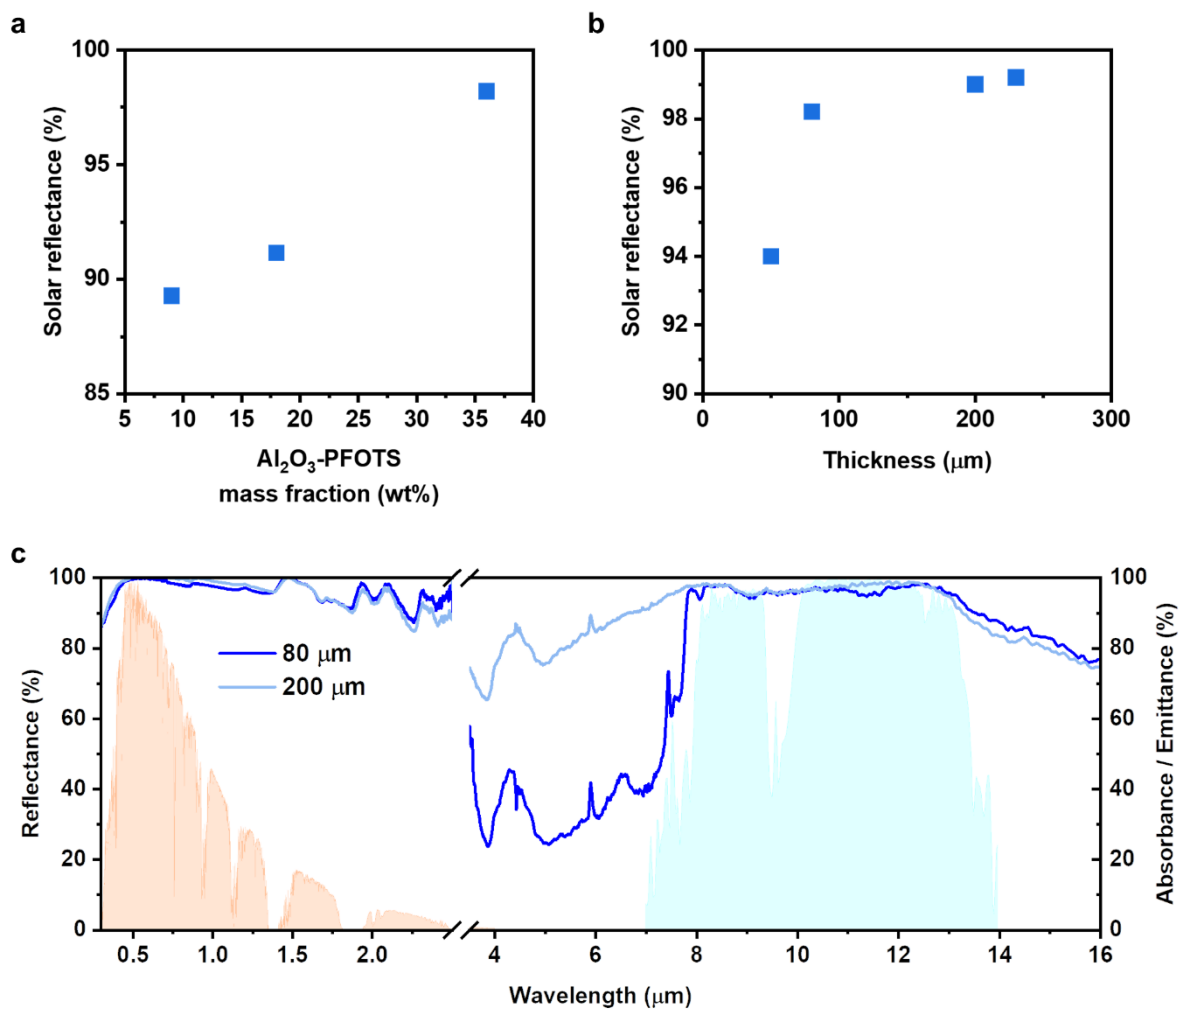

**Fig. S10** a) Effect of the Al<sub>2</sub>O<sub>3</sub>-PFOTS nanoparticles mass fraction on the solar reflectance. b) Effect of the thickness of the CYTOP/Al<sub>2</sub>O<sub>3</sub>-PFOTS on its solar reflectance. c) Optical properties of CYTOP/Al<sub>2</sub>O<sub>3</sub>-PFOTS with thicknesses of 80 μm and 200 μm on Si substrates.

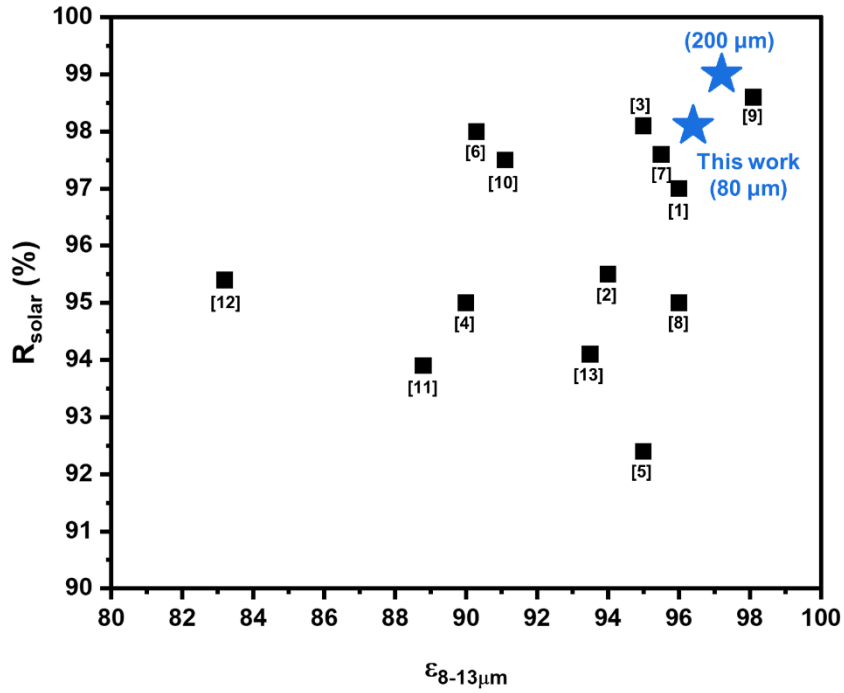

**Fig. S11** Solar reflectance and IR emittance in the atmospheric window of reported emitters (black squares) compared to CYTOP/Al<sub>2</sub>O<sub>3</sub>-PFOTS emitters (blue stars).

**Table S1** Thickness, solar reflectance, and IR emittance in the atmospheric window of reported emitters compared to CYTOP/Al<sub>2</sub>O<sub>3</sub>-PFOTS emitters.

| Materials                                              | Thickness (μm) | Optical properties |                            | Ref.      |
|--------------------------------------------------------|----------------|--------------------|----------------------------|-----------|
|                                                        |                | $R_{solar}$ (%)    | $\epsilon_{8-13\mu m}$ (%) |           |
| CYTOP/Al <sub>2</sub> O <sub>3</sub> -PFOTS            | 80             | 98.2               | 96.4                       | This work |
|                                                        | 200            | 99.0               | 97.2                       |           |
| SiO <sub>2</sub> /PVDF/TEOS                            | 300            | 97                 | 96                         | [S1]      |
| CaCO <sub>3</sub> /acrylic resin                       | 400            | 95.5               | 94                         | [S2]      |
| BaSO <sub>4</sub> /acrylic resin                       | 400            | 98.1               | 95                         | [S3]      |
| Al <sub>2</sub> O <sub>3</sub> /Silk                   | 200            | 95                 | 90                         | [S4]      |
| TiO <sub>2</sub> /PLA/PTFE                             | 500            | 92.4               | 95                         | [S5]      |
| h-BN/PDMS                                              | 1400           | 98                 | 90.3                       | [S6]      |
| Al <sub>2</sub> O <sub>3</sub> /TPU                    | 350            | 97.6               | 95.5                       | [S7]      |
| BaSO <sub>4</sub> /SiO <sub>2</sub> /PVDF              | 100            | 95                 | 96                         | [S8]      |
| BaSO <sub>4</sub> /ethyl cellulose                     | 700            | 98.6               | 98.1                       | [S9]      |
| SiO <sub>2</sub> /PVDF-HFP                             | 250            | 97.5               | 91.1                       | [S10]     |
| ZnO/HDPE                                               | 227.3          | 93.9               | 88.8                       | [S11]     |
| PTFE/POM                                               | 150            | 95.4               | 83.2                       | [S12]     |
| Al <sub>2</sub> O <sub>3</sub> /SiO <sub>2</sub> /DPHA | 250            | 94.1               | 93.5                       | [S13]     |

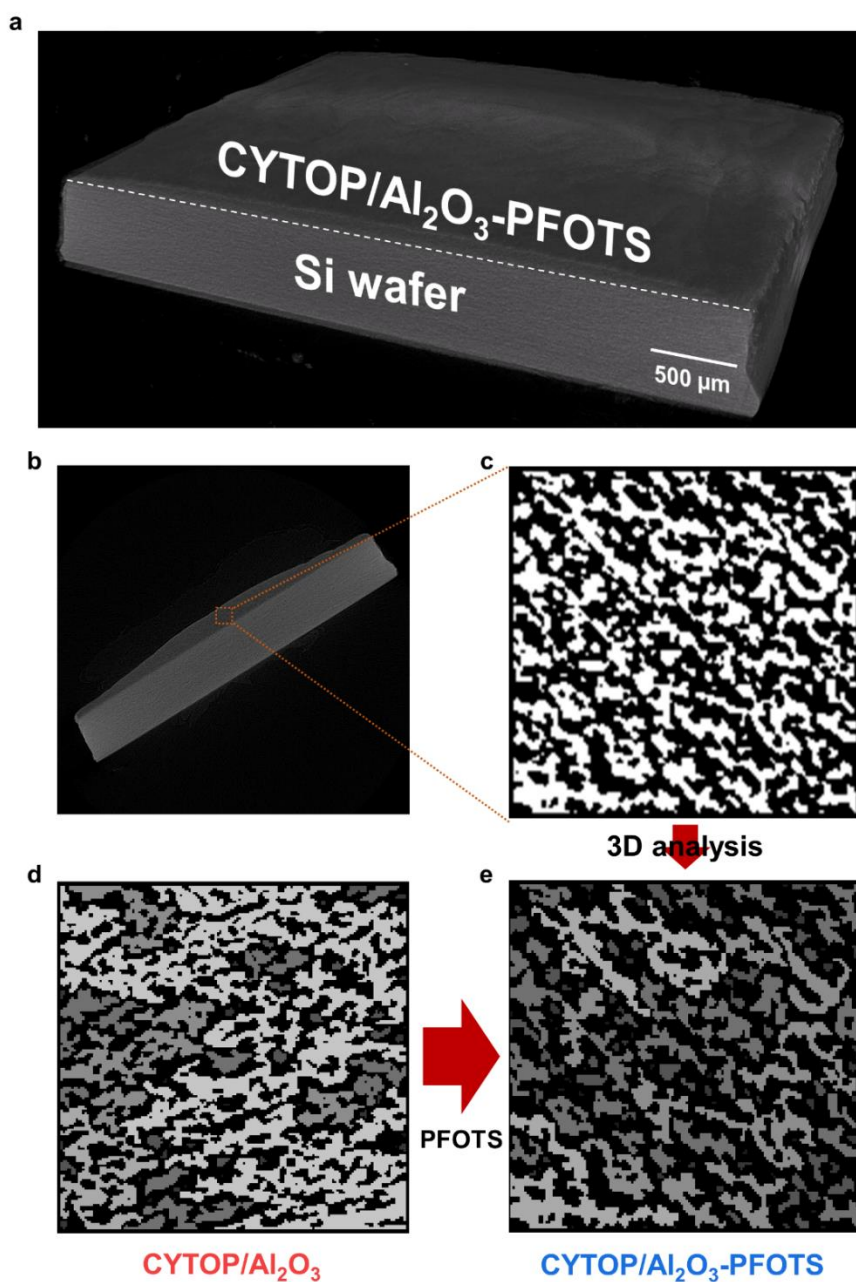

**Fig. S12** a) Microstructural visualization of CYTOP/Al<sub>2</sub>O<sub>3</sub>-PFOTS. b) Cross-sectional image of CYTOP/Al<sub>2</sub>O<sub>3</sub>-PFOTS and c) binary image of the region of interest (ROI). Three-dimensional analyzed binary images of d) CYTOP/bare-Al<sub>2</sub>O<sub>3</sub> (porosity: 47.1%) and e) CYTOP/Al<sub>2</sub>O<sub>3</sub>-PFOTS (porosity: 58.8%).

Note: In 3D analyzed binary images (Figure S12 d and e), the black areas represent air voids, while the gray regions indicate spaces filled with CYTOP/Al<sub>2</sub>O<sub>3</sub>(-PFOTS).

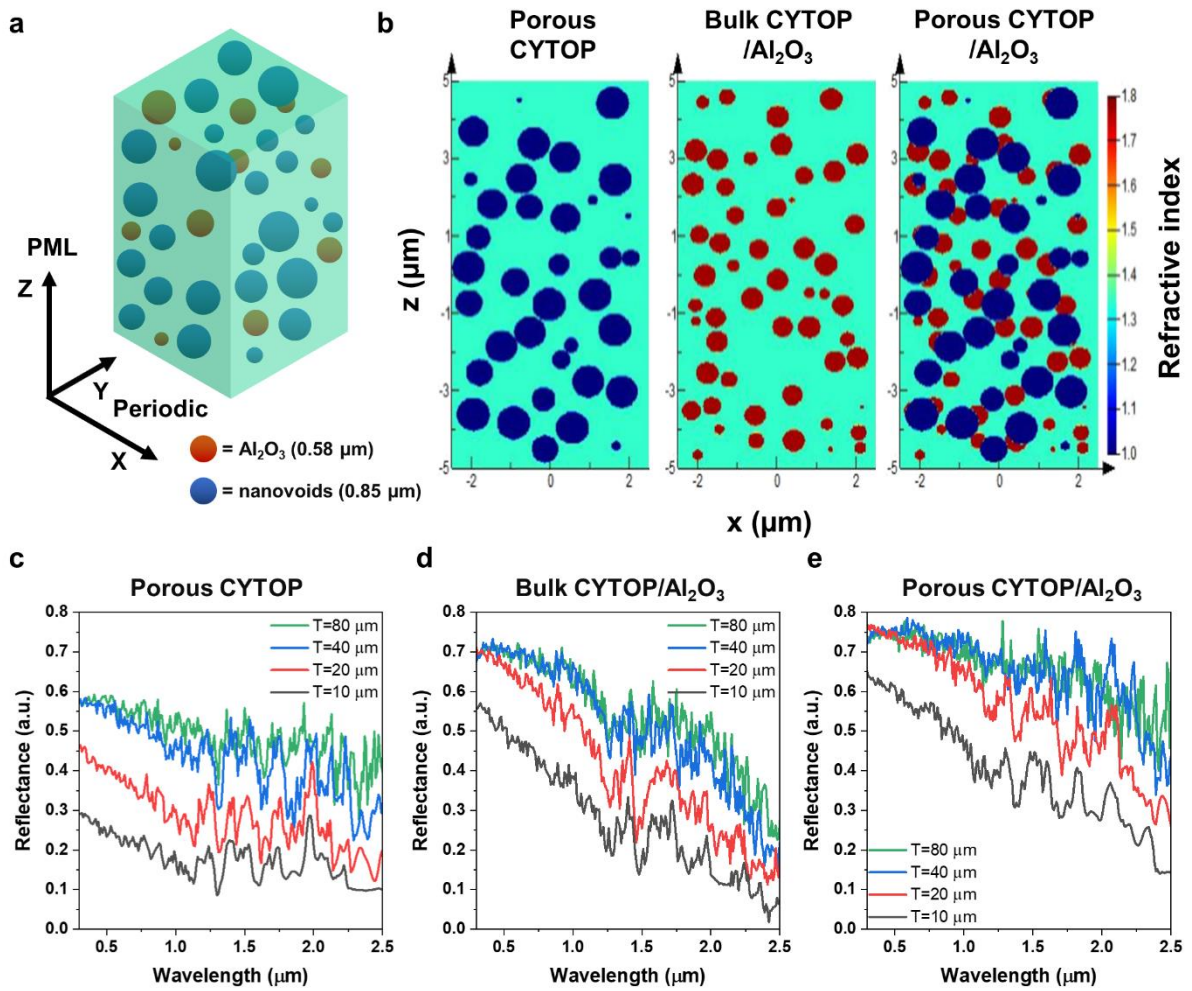

**Fig. S13** a) Schematic illustration of the domain and boundary conditions for FDTD simulations. b) Cross-sectional images of the simulation domain for porous CYTOP, bulk CYTOP/ $\text{Al}_2\text{O}_3$ , and porous CYTOP/ $\text{Al}_2\text{O}_3$ . FDTD simulated reflectance spectra of c) porous CYTOP, d) bulk CYTOP/ $\text{Al}_2\text{O}_3$ , and e) porous CYTOP/ $\text{Al}_2\text{O}_3$  with varying thicknesses.

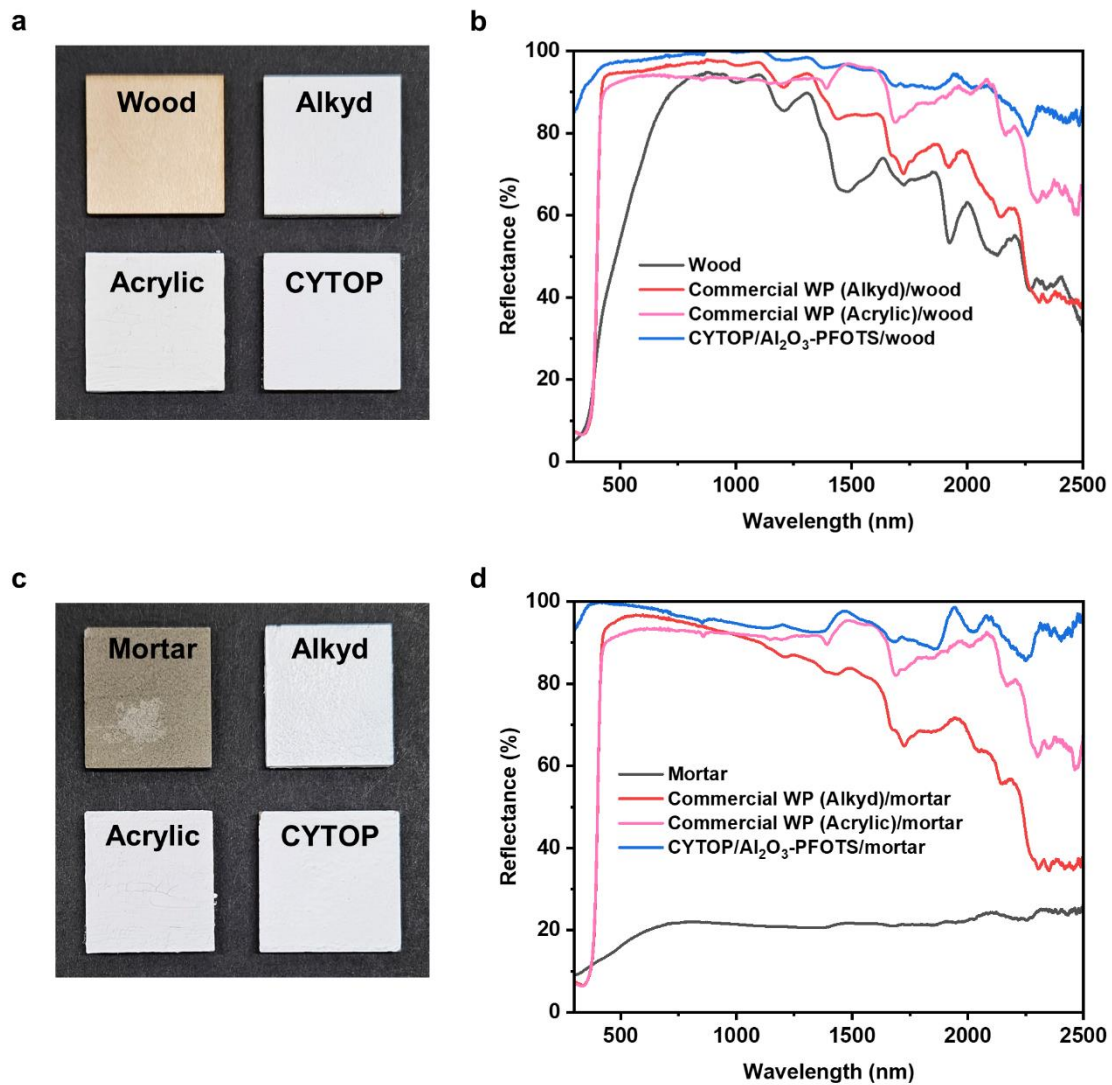

**Fig. S14** Photographs of a) wood and c) mortar substrates coated with various paints: bare wood (top left), alkyd paint-coated wood (top right), acrylic paint-coated wood (bottom left), and the CYTOP/ $\text{Al}_2\text{O}_3$ -PFOTS-coated wood (bottom right). Corresponding reflectance spectra of b) the wood and d) mortar substrates.



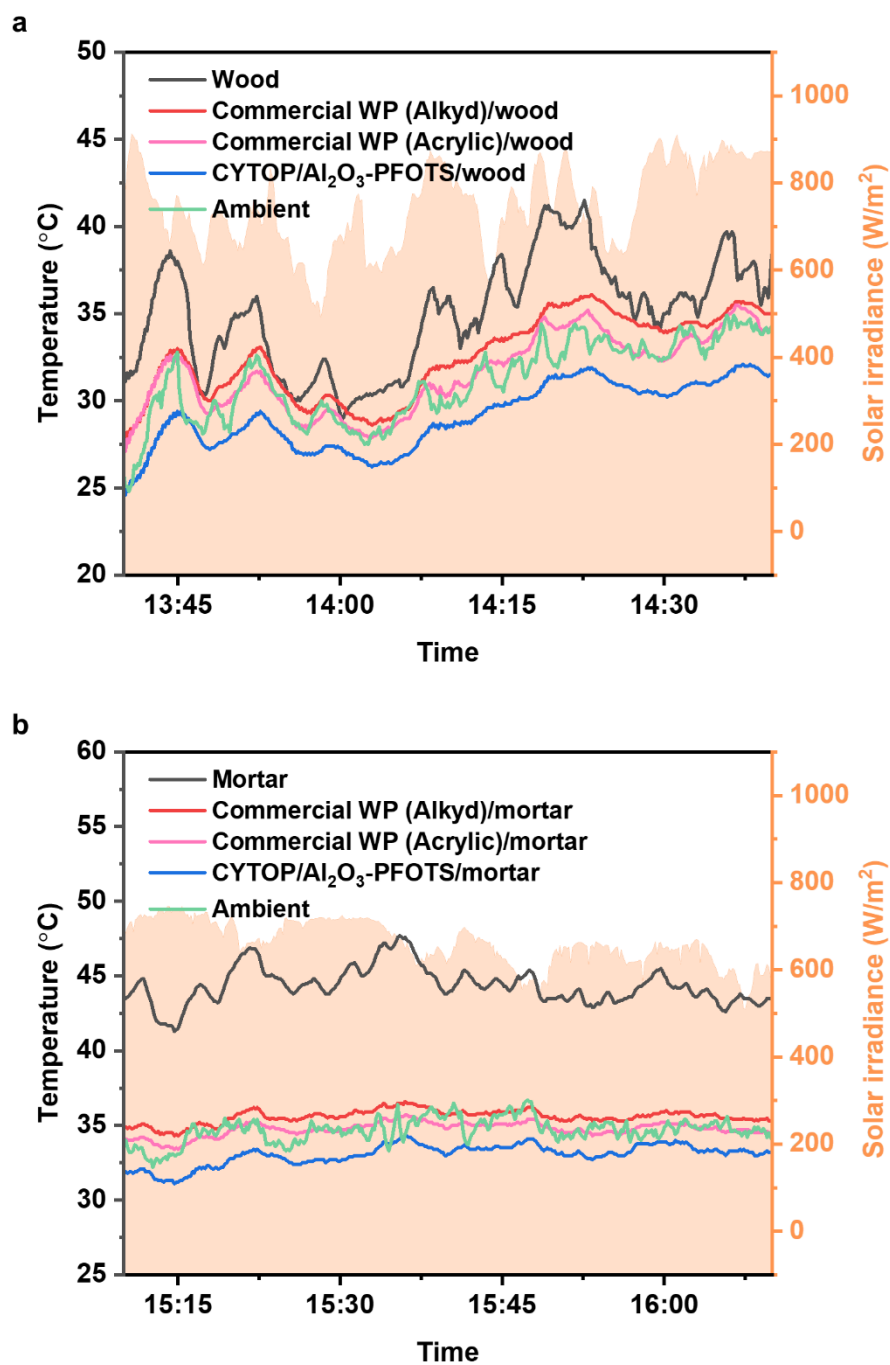

**Fig. S15** Surface temperature of a) wood and b) mortar substrates coated with various paints under direct sunlight.



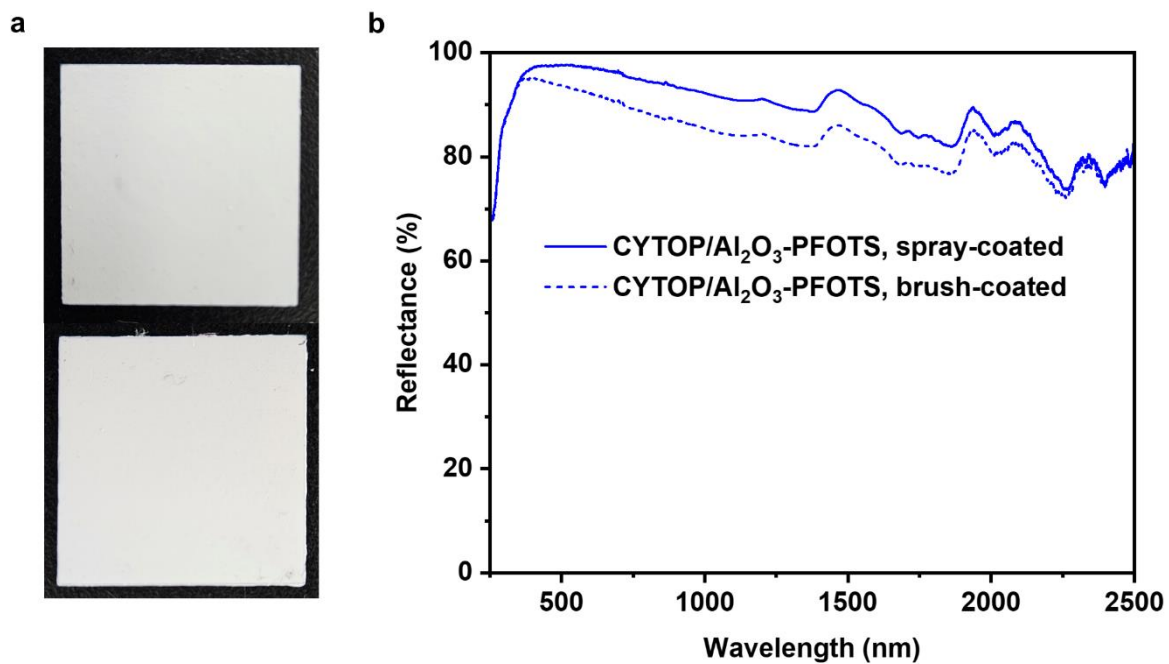

**Fig. S16** a) Photograph of CYTOP/ $\text{Al}_2\text{O}_3$ -PFOTS films on Si substrates: spray-coated (top) and brush-coated (bottom). b) Reflectance spectra of CYTOP/ $\text{Al}_2\text{O}_3$ -PFOTS films using different coating methods.

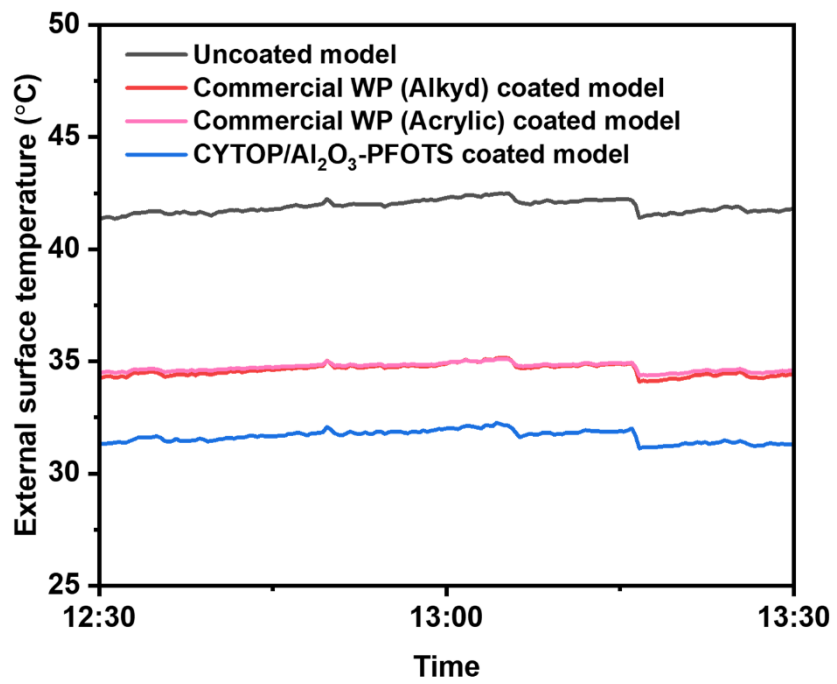

**Fig. S17** External surface temperature of the miniature buildings measured using an IR camera.

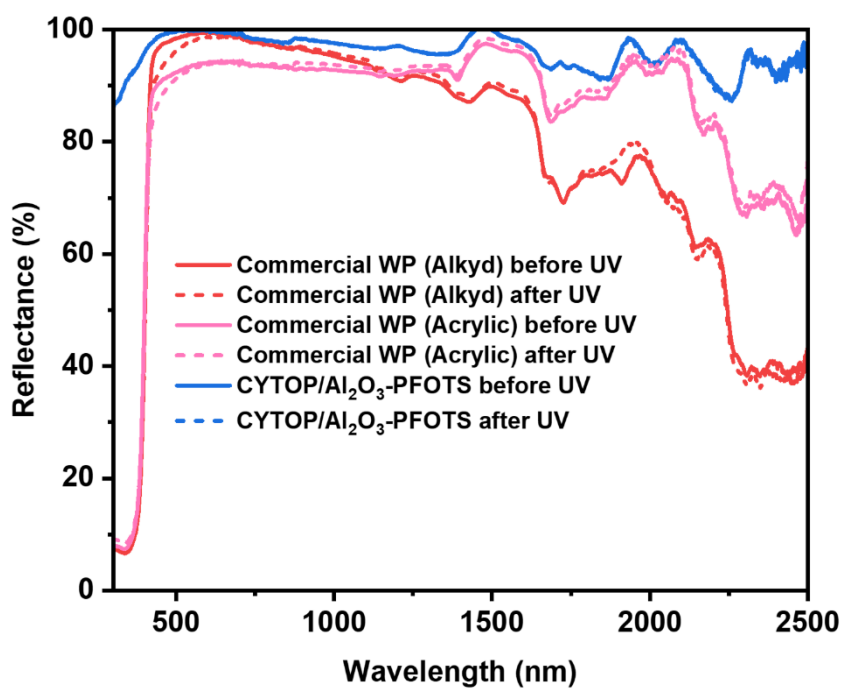

**Fig. S18** Changes in the UV-Vis-NIR spectra of alkyd paint, acrylic paint and the CYTOP/Al<sub>2</sub>O<sub>3</sub>-PFOTS films after 720 hours of UV-A radiation (365 nm)

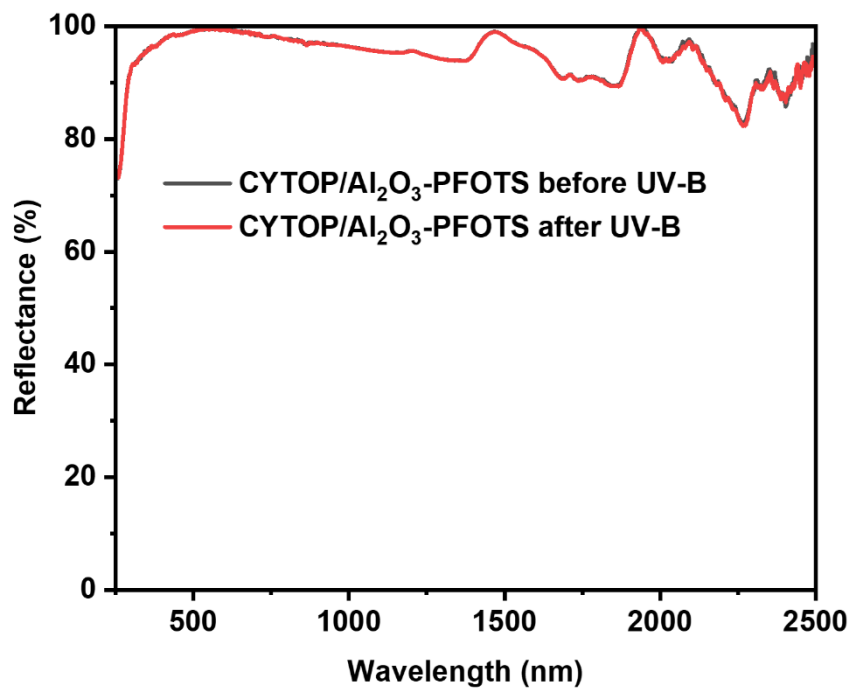

**Fig. S19** Change of the UV-Vis-NIR spectrum of the CYTOP/Al<sub>2</sub>O<sub>3</sub>-PFOTS film after 720 hours of UV-B radiation (312 nm)

a

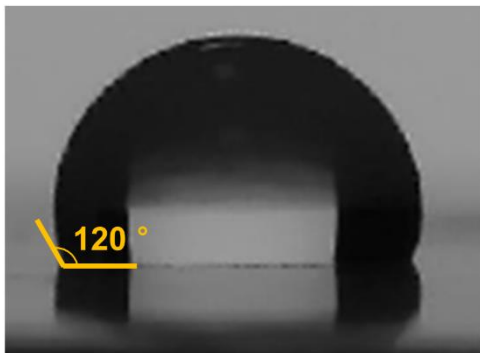

b

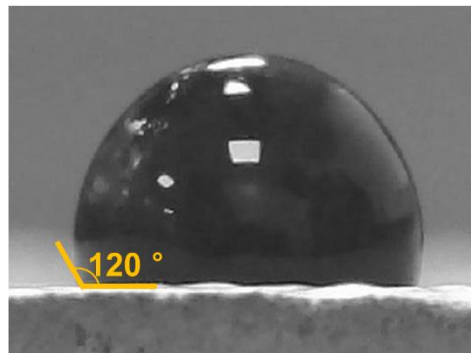

**Fig. S20** (a) Water contact angle and (b) the soiling agent contact angle of the CYTOP/ $\text{Al}_2\text{O}_3$ -PFOTS surface.

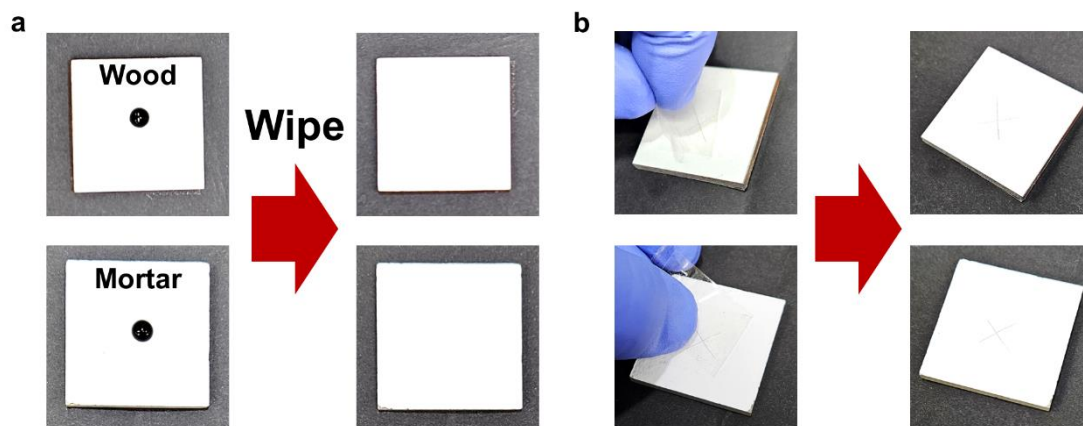

**Fig. S21** (a) Anti-fouling properties and (b) adhesivity of the CYTOP/Al<sub>2</sub>O<sub>3</sub>-PFOTS paint on wood and mortar substrates.

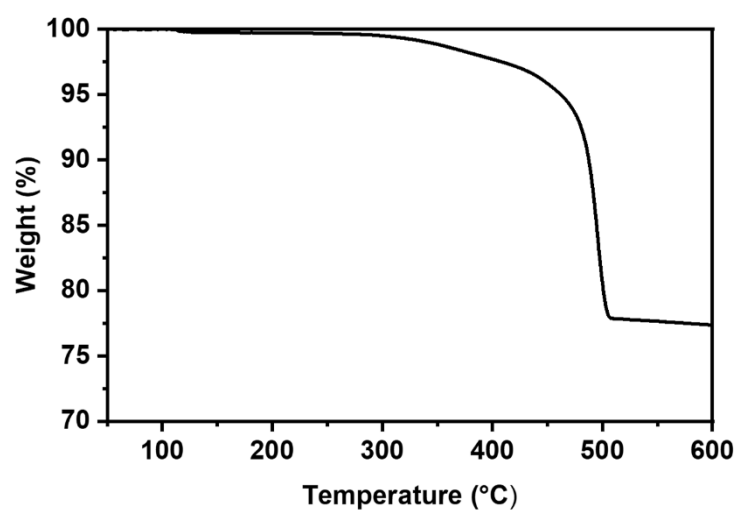

**Fig. S22** TGA curve of the CYTOP/Al<sub>2</sub>O<sub>3</sub>-PFOTS.

## Supporting References

- [S1] X. Wang, X. Liu, Z. Li, H. Zhang, Z. Yang, H. Zhou, T. Fan, *Adv. Funct. Mater.* **2020**, 30, 1907562.
- [S2] X. Li, J. Peoples, Z. Huang, Z. Zhao, J. Qiu, X. Ruan, *Cell Rep. Phys. Sci.* **2020**, 1, 100221.
- [S3] X. Li, J. Peoples, P. Yao, X. Ruan, *ACS Appl. Mater. Interfaces* **2021**, 13, 21733.
- [S4] B. Zhu, W. Li, Q. Zhang, D. Li, X. Liu, Y. Wang, N. Xu, Z. Wu, J. Li, X. Li, P. B. Catrysse, W. Xu, S. Fan, J. Zhu, *Nat. Nanotechnol.* **2021**, 16, 1342.
- [S5] S. Zeng, S. Pian, M. Su, Z. Wang, M. Wu, X. Liu, M. Chen, Y. Xiang, J. Wu, M. Zhang, Q. Cen, Y. Tang, X. Zhou, Z. Huang, R. Wang, A. Tunuhe, X. Sun, Z. Xia, M. Tian, M. Chen, X. Ma, L. Yang, J. Zhou, H. Zhou, Q. Yang, X. Li, Y. Ma, G. Tao, *Science* **2021**, 373, 692.
- [S6] P. Li, A. Wang, J. Fan, Q. Kang, P. Jiang, H. Bao, X. Huang, *Adv. Funct. Mater.* **2022**, 32, 2109542.
- [S7] X. Liu, C. Xiao, P. Wang, M. Yan, H. Wang, P. Xie, G. Liu, H. Zhou, D. Zhang, T. Fan, *Adv. Opt. Mater.* **2021**, 9, 2101151.
- [S8] Z. Cheng, H. Han, F. Wang, Y. Yan, X. Shi, H. Liang, X. Zhang, Y. Shuai, *Nano Energy* **2021**, 89, 106377.
- [S9] R. Liu, Z. Zhou, X. Mo, P. Liu, B. Hu, J. Duan, J. Zhou, *ACS Appl. Mater. Interfaces* **2022**, 14, 46972.
- [S10] H. Ma, L. Wang, S. Dou, H. Zhao, M. Huang, Z. Xu, X. Zhang, X. Xu, A. Zhang, H. Yue, G. Ali, C. Zhang, W. Zhou, Y. Li, Y. Zhan, C. Huang, *ACS Appl. Mater. Interfaces* **2021**, 13, 19282.
- [S11] F. Peng, K. Ren, G. Zheng, K. Dai, C. Gao, C. Liu, C. Shen, *Adv. Funct. Mater.* **2024**, 34, 2400221.
- [S12] X. Wu, J. Li, F. Xie, X.-E. Wu, S. Zhao, Q. Jiang, S. Zhang, B. Wang, Y. Li, D. Gao, R. Li, F. Wang, Y. Huang, Y. Zhao, Y. Zhang, W. Li, J. Zhu, R. Zhang, *Nat. Commun.* **2024**, 15, 815.
- [S13] D. Chae, S. Son, H. Lim, P. H. Jung, J. Ha, H. Lee, *Mater. Today Phys.* **2021**, 18, 100389.
